# Supplementary material for: Towards an assessment of riverine dissolved organic carbon in surface waters of the western Arctic Ocean based on remote sensing and biogeochemical modeling
Source: Copernicus journal article supplement (doi:10.5194/bg-15-1335-2018), 2018-03-05
Supplement: Supplementary file 1 [file bg-15-1335-2018-supplement.zip]

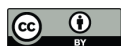

## *Supplement of*

# **Towards an assessment of riverine dissolved organic carbon in surface waters of the western Arctic Ocean based on remote sensing and biogeochemical modeling**

**Vincent Le Fouest et al.**

*Correspondence to:* Vincent Le Fouest ([vincent.le\\_fouest@univ-lr.fr](mailto:vincent.le_fouest@univ-lr.fr))

- [bg-15-1335-2018-supplement-title-page.pdf](#)
- [README.txt](#)
- [augu\\_rdoc\\_mod.nc](#)
- [augu\\_rdoc\\_sat.nc](#)
- [augu\\_ucurr\\_mod.nc](#)
- [augu\\_vcurr\\_mod.nc](#)
- [july\\_rdoc\\_mod.nc](#)
- [july\\_rdoc\\_sat.nc](#)
- [july\\_ucurr\\_mod.nc](#)
- [july\\_vcurr\\_mod.nc](#)
- [june\\_rdoc\\_mod.nc](#)
- [june\\_rdoc\\_sat.nc](#)
- [june\\_ucurr\\_mod.nc](#)
- [june\\_vcurr\\_mod.nc](#)
- [sept\\_rdoc\\_mod.nc](#)
- [sept\\_rdoc\\_sat.nc](#)
- [sept\\_ucurr\\_mod.nc](#)
- [sept\\_vcurr\\_mod.nc](#)

The copyright of individual parts of the supplement might differ from the CC BY 4.0 License.
